# Supplementary material for: Diagnostic value of circulating free DNA for the detection of EGFR mutation status in NSCLC: a systematic review and meta-analysis
Source: PubMed Central journal article supplement — Sci Rep. 2014 Sep 9;4:6269. doi: 10.1038/srep06269 (PMC5385820; doi:10.1038/srep06269), 2014-09-09

# **Diagnostic value of circulating free DNA for the detection of EGFR mutation status in NSCLC: a systematic review and meta-analysis**

**Jie Luo\*, Li Shen\*, Di Zheng**

Department of Medical Oncology, Shanghai Pulmonary Hospital, Tongji University School of  
Medicine, Shanghai 200433, China

## **Supplementary Information**

Figure S1. Summary of QUADAS-2 plot

|               | <u>Risk of Bias</u> |            |                    |                 | <u>Applicability Concerns</u> |            |                    |
|---------------|---------------------|------------|--------------------|-----------------|-------------------------------|------------|--------------------|
|               | Patient Selection   | Index Test | Reference Standard | Flow and Timing | Patient Selection             | Index Test | Reference Standard |
| Bai H         | +                   | +          | +                  | +               | +                             | +          | +                  |
| Goto K        | +                   | +          | +                  | +               | +                             | +          | +                  |
| He C          | +                   | +          | ?                  | +               | +                             | +          | +                  |
| Huang Z       | -                   | ?          | +                  | +               | +                             | +          | +                  |
| Hu C          | +                   | ?          | ?                  | +               | +                             | +          | +                  |
| Jiang B       | +                   | ?          | ?                  | +               | +                             | +          | +                  |
| Jing CW       | +                   | ?          | ?                  | +               | +                             | +          | +                  |
| Kim HR        | +                   | ?          | ?                  | +               | +                             | +          | +                  |
| Kim ST        | +                   | ?          | +                  | +               | +                             | +          | +                  |
| Kimura H      | +                   | ?          | +                  | +               | +                             | +          | +                  |
| Kimura H 2006 | +                   | ?          | +                  | +               | +                             | +          | +                  |
| Kuang Y       | -                   | ?          | +                  | +               | +                             | +          | +                  |
| Liu X         | +                   | ?          | ?                  | +               | +                             | +          | +                  |
| Lv C          | +                   | ?          | +                  | +               | +                             | +          | +                  |
| Wang S        | +                   | ?          | +                  | +               | +                             | +          | +                  |
| Xu F          | +                   | +          | +                  | +               | +                             | +          | +                  |
| Yam I         | -                   | ?          | +                  | +               | +                             | +          | +                  |
| Yung TK       | +                   | ?          | ?                  | +               | +                             | +          | +                  |
| Zhang H       | +                   | ?          | ?                  | +               | +                             | +          | +                  |
| Zhao X        | +                   | ?          | ?                  | +               | +                             | +          | +                  |

- High                     
? Unclear                     
+ Low

Risk of bias and applicability concerns were assessed as “high”, “low”, or “unclear”.

Figure S2. Forest plots of positive likelihood ratio and negative likelihood ratio

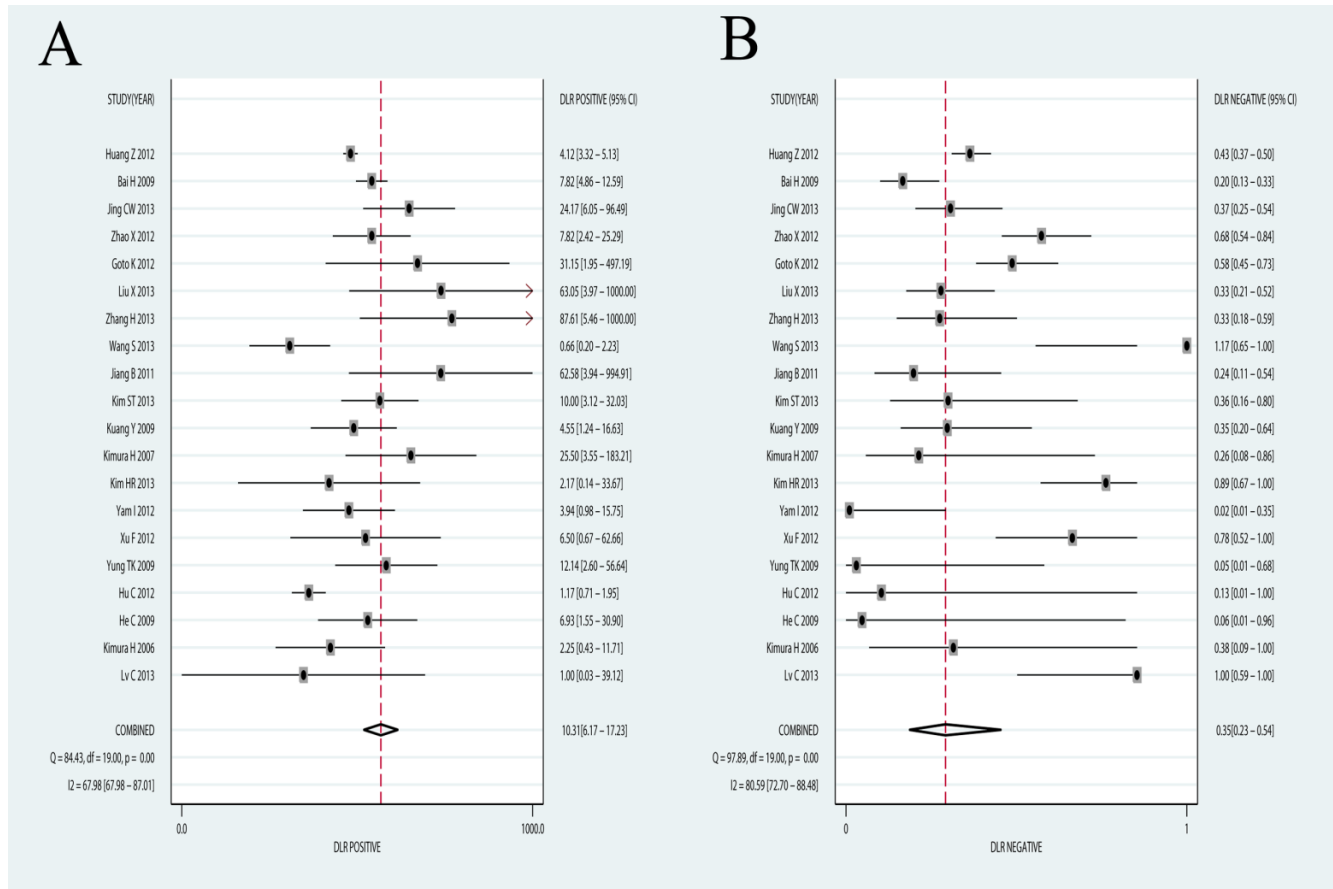

Figure S3. Forest plot of diagnostic odds ratio

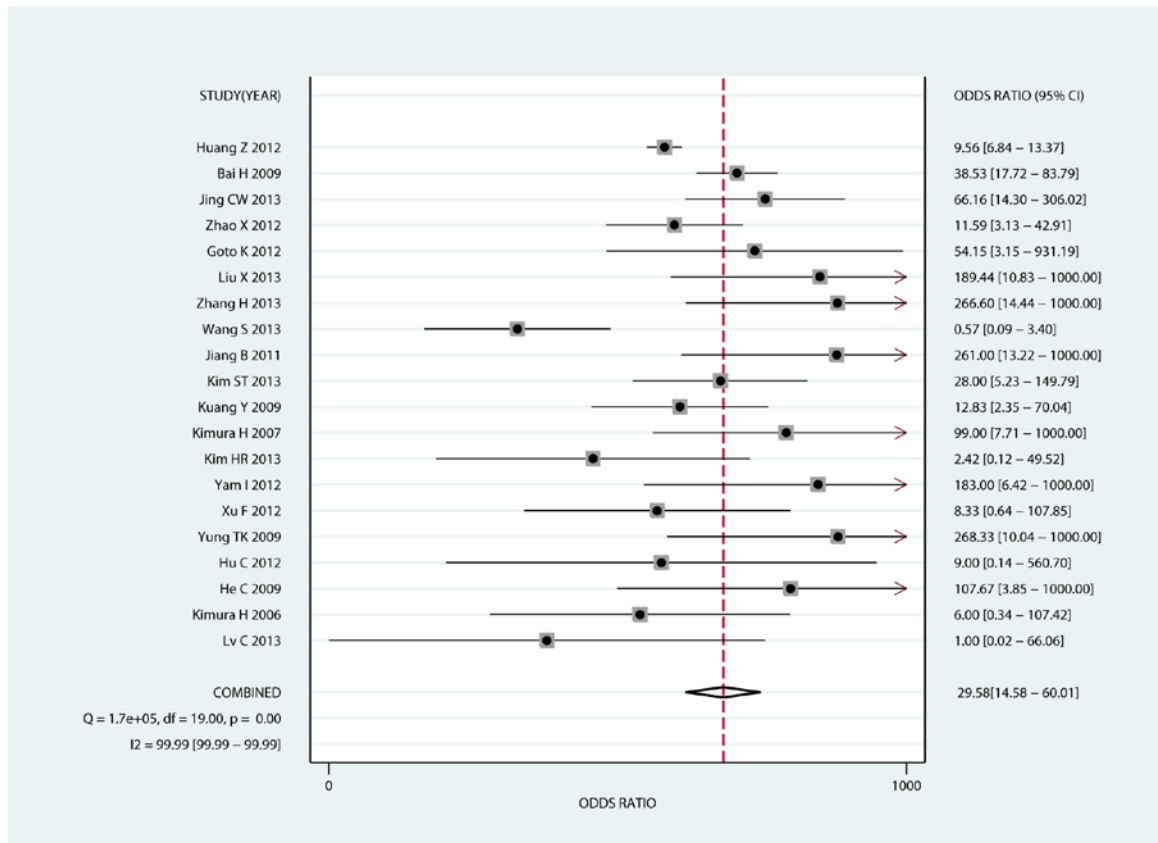

Figure S4. The receiver operative curve plot

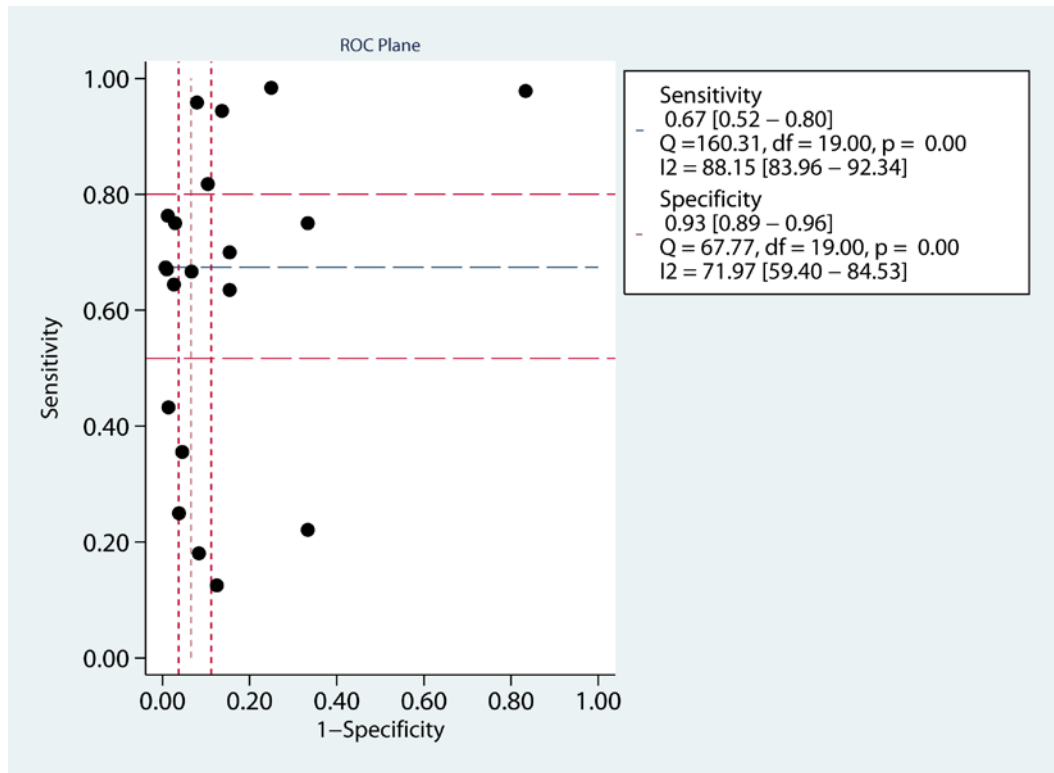

Supplement: srep06269-s1.pdf [file srep06269-s1.pdf]
